# Supplementary material for: Interplay between cooperativity of intercellular receptor–ligand binding and coalescence of nanoscale lipid clusters in adhering membranes
Source: Royal Society of Chemistry journal article supplement (doi:10.1039/d0sm01904f), 2020-12-22
Supplement: d0sm01904f1.pdf [file d0sm01904f1.pdf]

## **Supplementary Information:**

# **Interplay between cooperativity of intercellular receptor-ligand binding and coalescence of nanoscale lipid clusters in adhering membranes**

Long Li,<sup>a</sup> Jinglei Hu,<sup>\*b</sup> Xinghua Shi,<sup>c</sup> Bartosz Różycki,<sup>\*d</sup> Fan Song<sup>\*a,e</sup>

<sup>a</sup>State Key Laboratory of Nonlinear Mechanics and Beijing Key Laboratory of Engineered Construction and Mechanobiology,  
Institute of Mechanics, Chinese Academy of Sciences, Beijing, China.

<sup>b</sup>Kuang Yaming Honors School & Institute for Brain Sciences, Nanjing University, Nanjing, China.

<sup>c</sup>National Center for Nanoscience and Technology of China, Beijing, China.

<sup>d</sup>Institute of Physics, Polish Academy of Sciences, Al. Lotników 32/46, Warsaw, Poland.

<sup>e</sup>School of Engineering Science, University of Chinese Academy of Sciences, Beijing, China.

This document consists of two sections. The first one contains a detailed description of the mean-field calculation. The second section contains eight figures that supplement the main results.

## Mean field theory

We implemented the MF theory for adhering membranes without bending rigidity contrast between the raft patches and membrane matrix, i.e.,  $\kappa_r^0 = \kappa_m^0$ . We started with the *grand-canonical* Hamiltonian

$$\mathcal{H} = \mathcal{H}_{\text{ad}} - \mu_r \sum_i (n_i^+ + n_i^-) - \mu_p \sum_i (m_i^+ + m_i^-) \quad (\text{S1})$$

where  $\mu_r$  and  $\mu_p$  are the chemical potentials of the patches occupied by rafts and proteins, respectively. Transforming membrane composition variables  $n_i^0 = 0, 1$  to spin variables  $s_i^0 = 2n_i^0 - 1 = \pm 1$ , and using MF approximation  $s_i^0 s_j^0 \approx \langle s_i^0 \rangle s_j^0 + \langle s_j^0 \rangle s_i^0 - \langle s_i^0 \rangle \langle s_j^0 \rangle$  with the average  $\langle s_i^0 \rangle = \langle s_j^0 \rangle$ , we obtained MF Hamiltonian

$$\begin{aligned} \mathcal{H}_{\text{MF}} &= \mathcal{H}_{\text{me}} + \mathcal{H}_{\text{R-L}} + \\ &\sum_{o=+,-} \sum_i \left[ \varepsilon - U_{\text{eff}} s_i^o - \frac{U_a}{2} s_i^o m_i^o - \left( \frac{U_a}{2} + \mu_p \right) m_i^o \right] \end{aligned} \quad (\text{S2})$$

with  $\varepsilon = \frac{1}{2} (Us^2 - U - \mu_r)$  and  $U_{\text{eff}} = Us + U + \frac{1}{2}\mu_r$ , where  $s = \langle s_i^+ \rangle = \langle s_i^- \rangle$  because of the up-down symmetry of membrane system. Here, the membrane bending energy  $\mathcal{H}_{\text{me}}$  reduces to  $\mathcal{H}_{\text{me}} = \sum_i \kappa_{\text{eff}} / (2a^2) (\Delta_d l_i)^2$  with the effective bending rigidity  $\kappa_{\text{eff}} = \kappa_m^+ \kappa_m^- / (\kappa_m^+ + \kappa_m^-)$ . The grand-canonical partition function that sums over all configurations of the two membranes specified by the separation field  $\{l_i\}$  and over all degrees of freedom of both raft and protein patches takes the form

$$\begin{aligned} Z_{\text{MF}} &= \left[ \prod_i \int_0^\infty dl_i \right] \left[ \prod_i \sum_{s_i^+ = \pm 1} \sum_{s_i^- = \pm 1} \sum_{m_i^+ = 0,1} \sum_{m_i^- = 0,1} \right] e^{-\beta \mathcal{H}_{\text{MF}}} \\ &= e^{-2N\beta\varepsilon} \left[ \prod_i \int_0^\infty dl_i \right] \left[ e^{-\beta \mathcal{H}_{\text{me}}} \prod_i \sum_{\sigma^+ = \pm 1} \sum_{\sigma^- = \pm 1} w_{\sigma^+, \sigma^-}(l_i) \right] \end{aligned} \quad (\text{S3})$$

with  $\beta = (k_B T)^{-1}$  and

$$\begin{aligned} w_{\sigma^+, \sigma^-}(l_i) &= \left[ 1 + e^{\beta \left( \frac{\sigma^+ + 1}{2} U_a + \mu_p \right)} + e^{\beta \left( \frac{\sigma^- + 1}{2} U_a + \mu_p \right)} \right. \\ &\quad \left. + e^{\beta \left( \frac{\sigma^+ + \sigma^-}{2} U_a + U_a + 2\mu_p \right)} e^{\beta U_b \theta(l_b/2 - |l_i - l_c|)} \right] \\ &\quad e^{\beta U_{\text{eff}}(\sigma^+ + \sigma^-)} \end{aligned} \quad (\text{S4})$$

By defining  $A_{\sigma^+, \sigma^-} = w_{\sigma^+, \sigma^-}(l_i)|_{\theta(l_b/2 - |l_i - l_c|)=0}$  and  $B_{\sigma^+, \sigma^-} = w_{\sigma^+, \sigma^-}(l_i)|_{\theta(l_b/2 - |l_i - l_c|)=1}$ , the partition function given by Eq. (S3) can be rewritten as

$$Z_{\text{MF}} = e^{-2N\beta\epsilon} \left[ \sum_{\sigma^+ = \pm 1} \sum_{\sigma^- = \pm 1} A_{\sigma^+, \sigma^-} \right]^N \cdot \left[ \prod_i \int_0^\infty dl_i \right] e^{-\beta [\mathcal{H}_{\text{me}} + \sum_i V_{\text{b,eff}}(l_i)]} \quad (\text{S5})$$

where the effective binding potential  $V_{\text{b,eff}}(l_i) = -U_{\text{b,eff}}\theta(l_b/2 - |l_i - l_c|)$  is a square-well potential of the same width  $l_b$  and location  $l_c$  as the R-L binding potential in Eq. (2) in the main text. The effective binding strength

$$U_{\text{b,eff}} = k_B T \ln \frac{\sum_{\sigma^+} \sum_{\sigma^-} B_{\sigma^+, \sigma^-}}{\sum_{\sigma^+} \sum_{\sigma^-} A_{\sigma^+, \sigma^-}} \quad (\text{S6})$$

is a function of parameters  $U_b$ ,  $U_a$ ,  $U$ ,  $\mu_p$ ,  $\mu_r$  and  $T$ . The free energy per lattice site is

$$\mathcal{F} = -\frac{k_B T}{N} \ln Z_{\text{MF}} = 2\epsilon - k_B T \ln \left[ \sum_{\sigma^+ = \pm 1} \sum_{\sigma^- = \pm 1} A_{\sigma^+, \sigma^-} \right] + \mathcal{F}_0 \quad (\text{S7})$$

where

$$\mathcal{F}_0 = -\frac{k_B T}{N} \ln \left\{ \left[ \prod_i \int_0^\infty dl_i \right] e^{-\beta [\mathcal{H}_{\text{me}} + \sum_i V_{\text{b,eff}}(l_i)]} \right\} \quad (\text{S8})$$

is the free energy per lattice site for the reference system of two *homogeneous* membranes with Hamiltonian  $\mathcal{H}_0 = \mathcal{H}_{\text{me}} + \sum_i V_{\text{b,eff}}(l_i)$ .

Phase separation occurs if  $\mathcal{F}$  exhibits two equal minima separated by a maximum, implying that  $\partial \mathcal{F} / \partial s = 0$  has three roots, and  $\partial^2 \mathcal{F} / \partial s^2$  is negative for one of the roots and positive for the other two. The condition  $\partial \mathcal{F} / \partial s = 0$  leads to the self-consistent equation

$$s = P_b \frac{\sum_{\sigma^+} \sum_{\sigma^-} \frac{1}{2} (\sigma^+ + \sigma^-) B_{\sigma^+, \sigma^-}}{\sum_{\sigma^+} \sum_{\sigma^-} B_{\sigma^+, \sigma^-}} + (1 - P_b) \frac{\sum_{\sigma^+} \sum_{\sigma^-} \frac{1}{2} (\sigma^+ + \sigma^-) A_{\sigma^+, \sigma^-}}{\sum_{\sigma^+} \sum_{\sigma^-} A_{\sigma^+, \sigma^-}} \quad (\text{S9})$$

where  $P_b = -\partial \mathcal{F}_0 / \partial U_{\text{b,eff}} = \langle \theta(l_b/2 - |l_i - l_c|) \rangle_{\mathcal{H}_0}$  is the so-called contact probability of the *homogeneous* membranes. More precisely,  $0 \leq P_b \leq 1$  is the expectation value for the fraction of bound membrane patches, i.e., membrane patches with  $l_c - l_b/2 < l_i < l_c + l_b/2$  in the reference system.

In the case of two planar membranes within the R-L binding range, i.e. with  $\theta(l_b/2 - |l_i - l_c|) = 1$  at any site  $i$ ,  $P_b = 1$ . Eq. (S9) reduces to

$$s = \frac{\tilde{f}_{1,1} e^{2\beta U_s} - \tilde{f}_{-1,-1} e^{-2\beta U_s}}{\tilde{f}_{1,1} e^{2\beta U_s} + \tilde{f}_{-1,-1} e^{-2\beta U_s} + 2f_{-1,1}} \quad (\text{S10})$$

with  $f_{\sigma^+, \sigma^-} = 1 + e^{\beta(\frac{\sigma^+ + 1}{2} U_a + \mu_p)} + e^{\beta(\frac{\sigma^- + 1}{2} U_a + \mu_p)} + e^{\beta(\frac{\sigma^+ + \sigma^-}{2} U_a + U_a + 2\mu_p + U_b)}$ ,  $\tilde{f}_{1,1} = f_{1,1} e^{\beta(\mu_r + 2U)}$ , and  $\tilde{f}_{-1,-1} = f_{-1,-1} e^{-\beta(\mu_r + 2U)}$ .

The free energy in Eq. (S7) becomes

$$\mathcal{F} = U s^2 - U - \mu_r - k_B T \ln \left( \tilde{f}_{1,1} e^{2\beta U_s} + \tilde{f}_{-1,-1} e^{-2\beta U_s} + 2f_{-1,1} \right) \quad (\text{S11})$$

Evidently, Eq. (S10) has one trivial root  $s = 0$ , and two other roots opposite in signs and yielding the same free energy when  $\tilde{f}_{1,1} = \tilde{f}_{-1,-1} = (f_{1,1}f_{-1,-1})^{1/2}$ , i.e.,  $\mu_r = -2U - k_B T \ln t$  with  $t = (f_{1,1}/f_{-1,-1})^{1/2}$ . This leads to the phase transition line

$$U = -k_B T \frac{1}{2s} \ln \frac{(1 - s^2 + r^2 s^2)^{1/2} - rs}{1 + s} \quad (\text{S12})$$

with  $r = f_{-1,1}/(f_{1,1}f_{-1,-1})^{1/2}$ . The lowest point on this line gives the critical contact energy  $U^*$ . The area concentration of the adhesion proteins on each membrane,  $c_p = -(\partial \mathcal{F} / \partial \mu_p) / (2a^2)$ , is given by

$$a^2 c_p = 1 - \frac{(e^{2\beta U s} / t + 1) [1 + e^{\beta(U_a + \mu_p)}] + (e^{-2\beta U s} t + 1)(1 + e^{\beta \mu_p})}{\tilde{f}_{1,1} e^{2\beta U s} + \tilde{f}_{-1,-1} e^{-2\beta U s} + 2f_{-1,1}} \quad (\text{S13})$$

Eqs. (S12) and (S13) together determine the phase diagram in the  $(c_p, U)$  coordinates for the planar membrane system.

In the case of fluctuating membranes we determined  $P_b$  by simulating the reference system of two homogeneous membranes with Hamiltonian  $\mathcal{H}_0$ . We then identified the phase transition points by numerically solving Eq. (S9) under the same constraint as for the planar membrane system that the solutions shall lead to equal minima of the free energy  $\mathcal{F}$ .

To determine the Hill plots, i.e. the plots of  $\log([RL]/[R])$  versus  $\log([L])$ , we first determined the chemical potentials  $\mu_r$  and  $\mu_p$  via the relations  $c_p = -(\partial \mathcal{F} / \partial \mu_p) / (2a^2)$  and  $x = -(\partial \mathcal{F} / \partial \mu_r) / (2a^2)$  for given values of  $c_p$ ,  $x$ ,  $U_a$ ,  $U_b$ , and  $U$ . We then obtained  $[RL] = (\partial \mathcal{F} / \partial U_b) / a^2$ , and  $[R] = [L] = c_p - [RL]$ . Here, the free energy per lattice  $\mathcal{F}$  is given by Eq. (S7).

## Supplementary figures

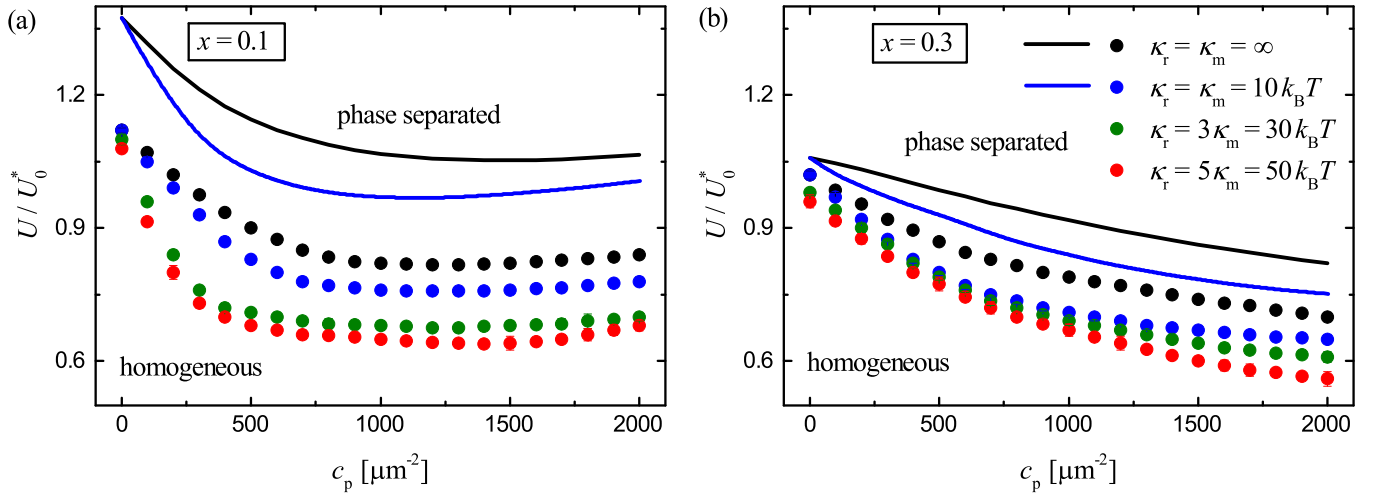

**Fig. S1.** Analogous to the phase diagram in Fig. 2d but for  $x = 0.1$  (a) and  $x = 0.3$  (b).

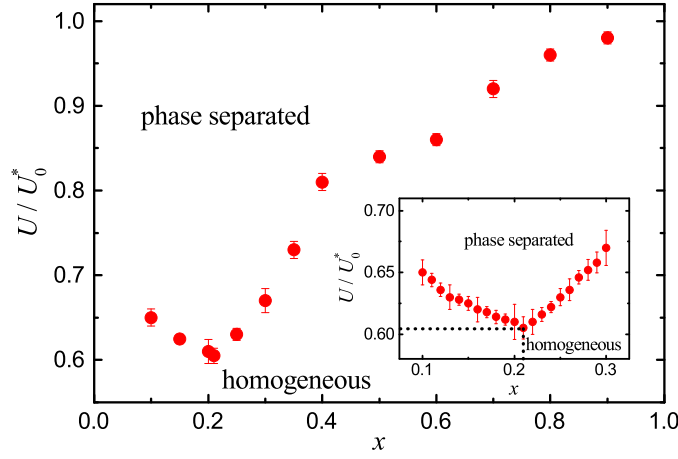

**Fig. S2.** An example of the phase diagram in the  $(x, U/U_0^*)$  coordinates for  $U_b = 6k_B T$ ,  $U_a = 3k_B T$ , and  $c_p = 1000 \mu\text{m}^{-2}$ . The location of the critical point is indicated in the inset.

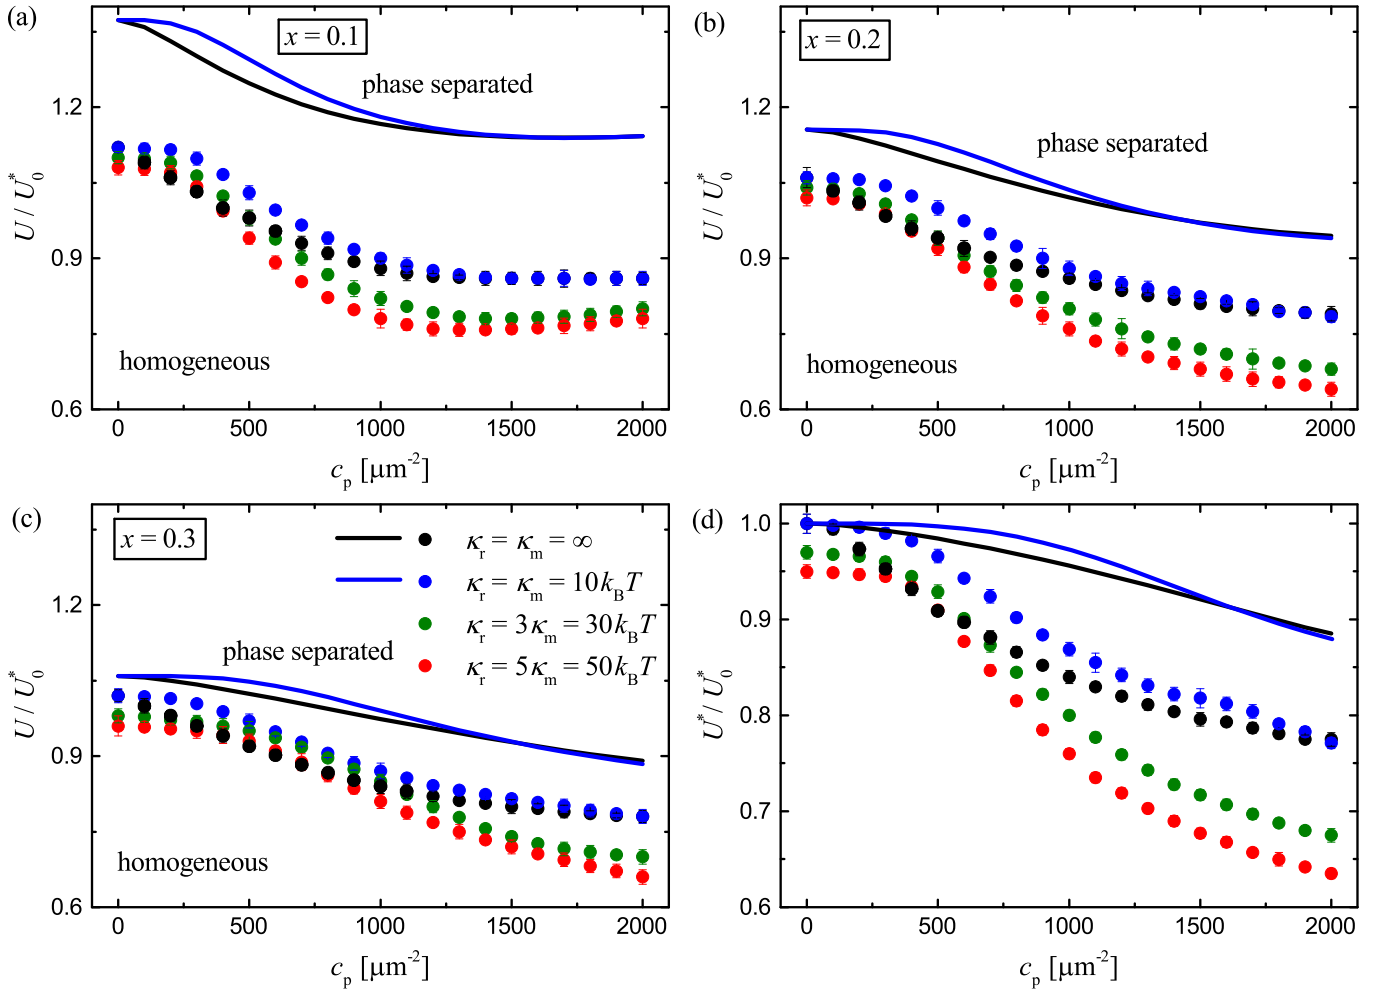

**Fig. S3.** MC and MF results for different membrane systems at  $U_b = 3k_B T$ ,  $U_a = 3k_B T$ . (a)-(c) Phase diagrams in the  $(c_p, U/U_0^*)$  coordinates for  $x=0.1$  (a),  $0.2$  (b) and  $0.3$  (c). The bending rigidities  $\kappa_m$  and  $\kappa_r$  are indicated by different colors and specified in panel (c). The ordered and disordered phase is indicated in the phase diagrams. (d) Contact energy at the critical point,  $U^*$ , as a function of protein concentration  $c_p$  for membrane systems with different bending rigidities  $\kappa_m$  and  $\kappa_r$ . Color code as in panel (c).

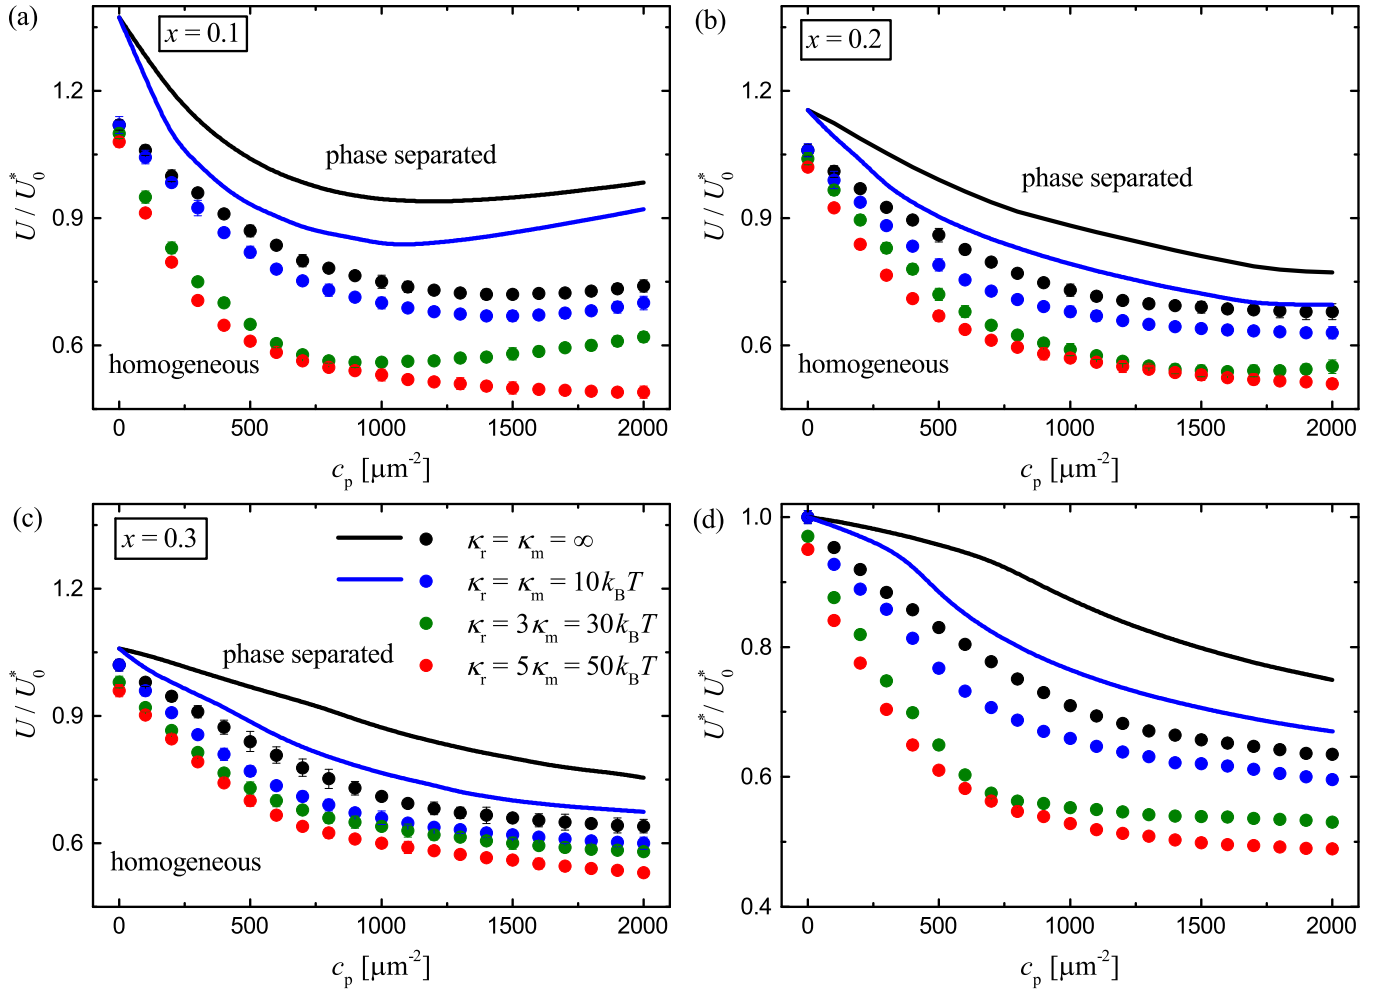

**Fig. S4.** Analogous to Fig. S3 but for  $U_b = 6k_B T$  and  $U_a = 4k_B T$ .

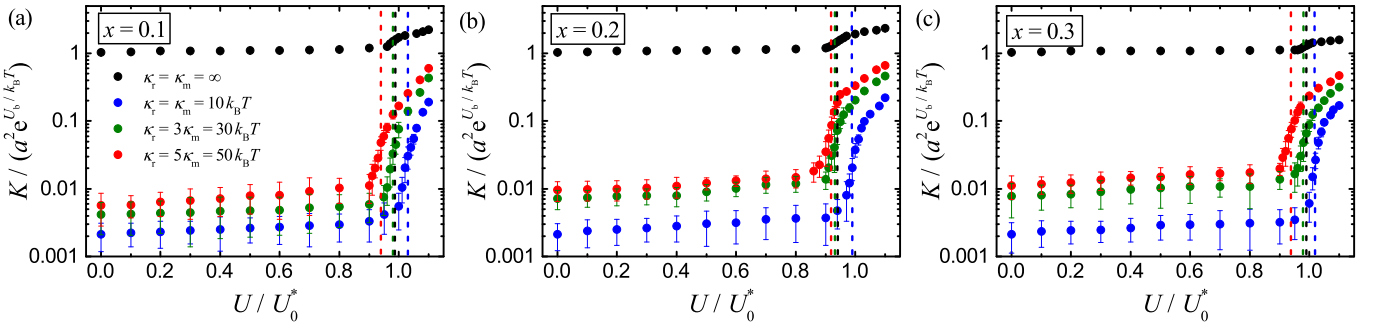

**Fig. S5.** Analogous to Fig. 3 in the main text but for  $U_b = 3k_B T$  and  $U_a = 3k_B T$ .

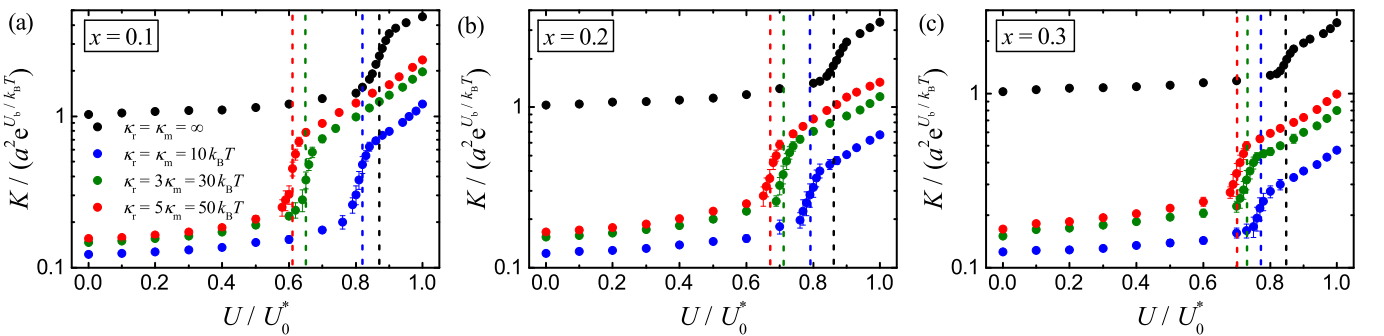

**Fig. S6.** Analogous to Fig. 3 in the main text but for  $U_b = 6k_B T$  and  $U_a = 4k_B T$ .

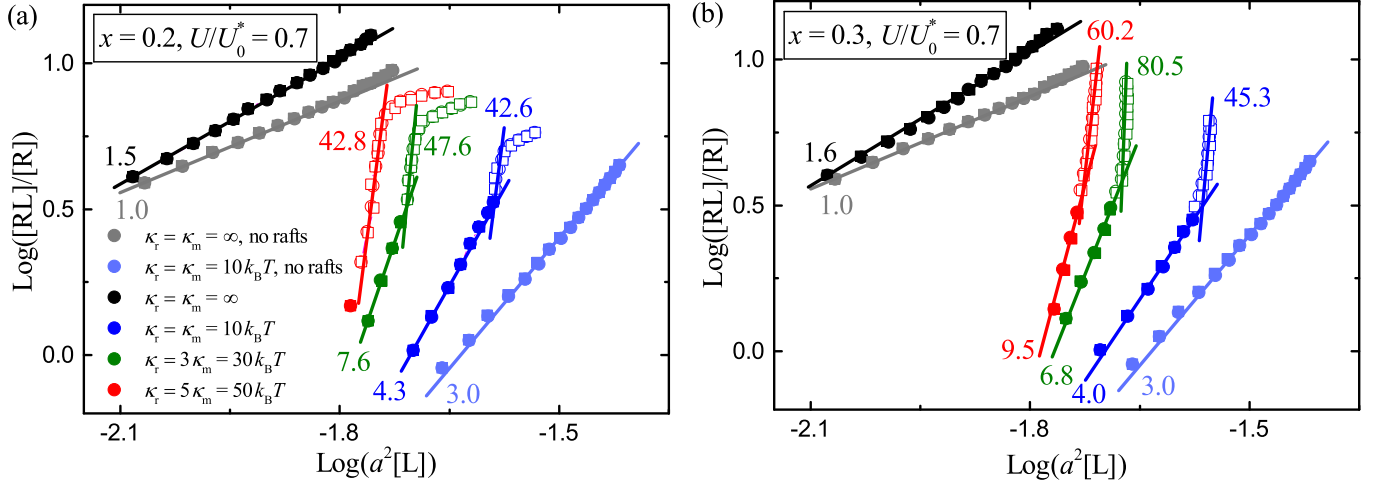

**Fig. S7.** Analogous to Figs. 4c and 4d in the main text but for different sizes of the adhering membranes. The data points marked as dots were obtained from MC simulations with  $100 \times 100$  lattice sites. The data points marked as squares were obtained from MC simulations with  $60 \times 60$  lattice sites.

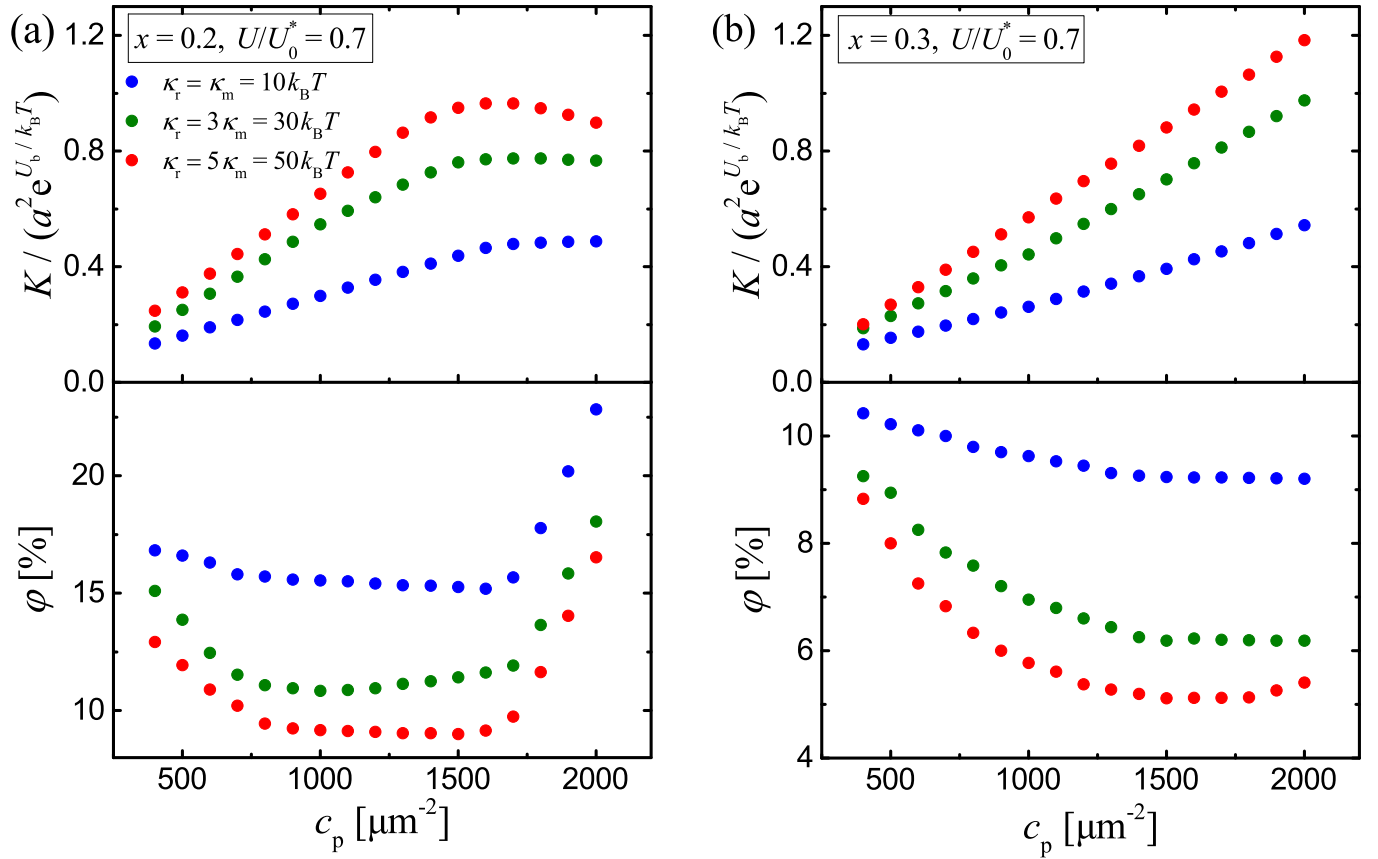

**Fig. S8.** Binding constant  $K$  and percentage of adhesion proteins in the membrane matrix,  $\phi$ , as a function of protein concentration  $c_p$ . Here,  $U_b = 6k_B T$ ,  $U_a = 3k_B T$ ,  $U = 0.7U_0^*$  and  $x = 0.2$  (a) or  $x = 0.3$  (b). The bending rigidities  $\kappa_m$  and  $\kappa_r$  of the membrane matrix and lipid rafts are specified in panel (a).
